# Supplementary material
Source: publisher figshare collection journal article supplement (https://gsapubs.figshare.com/ndownloader/files/22743515)
Supplement: Supplementary file 1 [file 22743515]

## **Emplacement of the Santa Rita Flat pluton as a pluton-scale saddle reef: Comment and Reply**

### **REPLY**

**John A. Vines and Richard D. Law**

Department of Geological Sciences, Virginia Tech., Blacksburg, Virginia 24061-0420.

### **DATA REPOSITORY MATERIAL**

#### **WALL ROCK STRUCTURE**

In Figure 1 of our Reply (Vines and Law, 2001) we illustrate the non-cylindrical nature of folding of metasedimentary rocks of the White-Inyo Range by showing a non-cylindrical anticline-syncline pair on the southwest-dipping limb of the Inyo Anticline before intrusion of Jurassic and Cretaceous plutons. In our model we propose that the early stage evolution of the Santa Rita Flat pluton was associated with flexural slip and dilation in the synclinal hinge zone of this fold pair. These non-cylindrical folds could plunge towards either the north-northwest or south-southeast. Because of the southward dips observed to the north of the pluton we are inclined to favor a dominant southerly plunge direction (Fig. 1), but caution must be exercised because local country rock structure to the north of the c. 165 Ma Santa Rita Flat pluton may well be influenced by later intrusion of the Cretaceous age Papoose Flat pluton (Morgan et al., 1998; Saint Blanquat et al., 2001).

#### **DEPTH OF PLUTON EMPLACEMENT**

We appreciate the reservations that Stevens et al. (2001) may have on mechanical grounds concerning space being made for intrusion of the Santa Rita Flat pluton by flexural slip and hinge zone dilation at depth in the crust, but point out that km-scale saddle reef formation has been well documented for many decades in the minerals industry, and is known to occur under both greenschist (e.g. Fowler and Winsor, 1996) and amphibolite (e.g. Mendelsohn, 1961) facies conditions. In contrast, we believe the Santa Rita Flat pluton would have formed at a much shallower crustal level. Based on available data (Dunne and Walker, 1993; Dunne et al., 1998) we estimate the pluton was emplaced beneath a maximum stratigraphic thickness of 2.1 km of uppermost Paleozoic and Mesozoic (> 165 Ma) rocks. Assuming a dip of between 25 and 40° for the western limb of the Inyo Anticline, this would correspond to an overburden of between 2.3 and 2.7 km; this crustal depth is similar to that at which well-documented laccoliths, such as those of the Henry Mountains of Utah (0.9-2.2 km depth; Cory, 1988), were emplaced.

## **PLUTON EMPLACEMENT RATES ASSOCIATED WITH SADDLE REEF MECHANISM**

Stevens et al. (2001) question the likely ability of folding processes to operate at a sufficient rate to accommodate magma flux. In the case of the Santa Rita Flat pluton we concur with this view and specifically developed a two stage model to account for formation of the pluton in which cavity opening is only able to keep pace with the rate of magma influx during the first stage of pluton formation (Vines and Law, 2000) - see Point 4 of our Reply (Vines and Law, 2001). In a more general sense, however, we do not share Stevens et al.'s pessimism concerning the inability of folding processes to keep pace with magma influx, because injection of pressured fluids into dilating hinge zones may itself facilitate an increase in strain rate (cf. Hollister and Crawford, 1986). At present very little data is available on the rates at which natural folding processes actually occur. Estimated rates of present day and geologically recent uplift associated with folding range from 0.1-0.2 mm per year (e.g. Pinter et al., 2001) to 11-15 mm per year (e.g. Lees and Falcon, 1952; Lavé and Avouac, 2000), with uplift rates commonly falling in the 2-7 mm per year range (e.g. Vita-Finzi, 1979; Mann and Vita-Finzi, 1988; Rockwell et al., 1988; Keller et al., 1998; Sylvester, 2000). Depending on competency, ratio of bed thickness to limb length, interlimb angle, and variation in bed thickness (Ramsay and Huber, 1987, p. 422-424), maximum associated rates of vertical hinge zone dilation would be on the order of 10-20% of these uplift rates, and flexural slip could in 10,000 years, for example, accommodate a saddle reef (or phacolith) measuring 2-14 m in height.

## **REFERENCES**

- Corry, C.E., 1988, Laccoliths; Mechanics of emplacement and growth: Geological Society of America Special Paper, No. 220. 110 p.
- Dunne, G.C., Garvey, T.P., Osborne, M., Schniederiet, D., Frische, A.E., and Walker, J.D., 1998, Geology of the Inyo Mountains Volcanic Complex: implications for Jurassic paleogeography of the Sierran magmatic arc in eastern California: Geological Society of America Bulletin, v. 110, 1376-1397.
- Dunne, G.C., and Walker, J.D., 1993, Age of Jurassic volcanism and tectonism, southern Owens Valley region, east-central California: Geological Society of America Bulletin, v. 105, 1223-1230.
- Fowler, T.J., and Winsor, C.N., 1996, Evolution of chevron folds by profile shape changes: comparison between multilayer deformation experiments and folds of the Bendigo-Castlemaine goldfields, Australia: Tectonophysics, v. 258, 125-150.
- Hollister, L.S., and Crawford, M.L., 1986, Melt-enhanced deformation: a major tectonic process: Geology, v.14, 558-561.
- Keller, E.A., Zepeda, R.L., Rockwell, T.K., Ku, T.L., and Dinklage, W.S., 1998, Active tectonics at Wheeler Ridge, southern San Joaquin Valley, California: Geological Society of America Bulletin, v. 110, 298-310.
- Lavé, J., and Avouac, J.P., 2000, Active folding of fluvial terraces across the Siwaliks Hills, Himalayas of central Nepal: Journal of Geophysical Research, v. 105, 5735-5770.
- Lees, G.M., and Falcon, N.L., 1952, Geographical history of Mesopotamian Plains: Geographical Journal, v. 118, 24-39.

- Mann, C D; Vita-Finzi, C, 1988, Holocene serial folding in the Zagros, *in* Audley-Charles, M.G., and Hallam, A., eds., Gondwana and Tethys: Geological Society of London Special Publication 37, 51-59
- Mendelsohn, F., 1961, The geology of the Northern Rhodesia Copperbelt: London, MacDonald, 523 p.
- Morgan, S.S., Law, R.D., and Nyman, M.W., 1998, Laccolith-like emplacement model for the Papoose Flat pluton based on porphyroblast-matrix analysis: Geological Society of America Bulletin, v. 110, p. 96-110.
- Pinter, N., Johns, B., Little, B., and Vestal, W.D., 2001, Fault-related folding in California's Northern Channel Islands documented by rapid-static GPS positioning: GSA Today, v. 11, 4-9.
- Ramsay, J.G., and Huber, M.I., 1987, The techniques of modern structural geology, Vol. 2: folds and fractures: London, Academic Press, 394p.
- Rockwell, T.K., Keller, E.A., and Dembroff, G.R., 1988, Quaternary rate of folding of the Ventura Avenue anticline, western Transverse Ranges, southern California: Geological Society of America Bulletin, v. 100, 850-858.
- Ross, D. C., 1965, Geology of the Independence quadrangle, Inyo County, California: U.S. Geological Survey Bulletin, v. 1181-0, 64 p.
- Saint Blanquat, M., Law, R.D., Bouchez, J.L., and Morgan, S.S., 2001, Internal structure and emplacement of the Papoose Flat pluton: an integrated structural, petrographic and magnetic susceptibility study: Geological Society of America Bulletin, v. 113, 976-995.
- Stevens, C.H., Stone, P., and Miller, R.B., 2001 Emplacement of the Santa Rita Flat pluton as a pluton-scale saddle reef: Comment: Geology v. 29, xxxx-xxxx
- Sylvester, A.G., 2000, Aseismic growth of Ventura Anticline, southern California, 1978-1997: evidence from precise leveling: Surveying and Land Information Systems: v. 60, 95-108.
- Vines, J.A. and Law, R.D., 2000, Emplacement of the Santa Rita Flat pluton as a pluton-scale saddle reef: Geology v. 28, 1115-1118.
- Vines, J.A. and Law, R.D., 2001, Emplacement of the Santa Rita Flat pluton as a pluton-scale saddle reef: Reply: Geology v. 29, xxxx-xxxx.
- Vita-Finzi, C., 1979, Rates of Holocene folding in the coastal Zagros near Bandar Abbas, Iran: Nature, v. 278, 632-634.
